# Supplementary material for: Organic Carbon Burial in Global Continental Margin Sediments
Source: Research Square preprint supplement (doi:10.21203/rs.3.rs-8174193/v1), 2026-01-19
Supplement: Supplementary file 1 [file db0b628960a4850d17c6c580.xlsx]

## Sheet: AgeHorizon_7_MARCAT
Years below zbio
		TOC flux (TgC y-1)					Frac total	Area		Burial / Area	Avg TOC flux (tC km-2 y-1)					BE (%)				Mean SAR	OM initial age
MARCAT	CODE	SWI	1 years	100 years	1000 years	5000 years	at 5ky	Size (km2)	Frac total		SWI	1 years	100 years	1000 years	5000 years	1 years	100 years	1000 years	5000 years	cm/yr	years
EBC	1	24.1963	17.4015	15.1363	12.1367	10.0635	4.09161	4.98637e+06	8.85848	0.461886	4.85249	3.4898	3.03552	2.43397	2.01821	71.9177	62.556	50.1591	41.5912	0.0366063	46.2289
WBC	2	70.0471	53.6966	46.41	37.9263	31.8303	12.9415	7.28227e+06	12.9372	1.00033	9.61885	7.37361	6.37301	5.20803	4.37093	76.6579	66.2554	54.144	45.4413	0.155907	46.7286
Indian	3	61.0694	48.5625	43.5291	35.8809	30.0322	12.2104	5.12014e+06	9.09612	1.34238	11.9273	9.4846	8.50155	7.00781	5.86551	79.5202	71.2781	58.7544	49.1772	0.118058	71.7044
Sub-Polar	4	42.5779	34.2983	28.4108	22.4807	18.6377	7.57766	5.50083e+06	9.77243	0.775412	7.74028	6.23511	5.16482	4.08679	3.38816	80.5541	66.7266	52.799	43.7731	0.0984248	42.5821
Polar	5	111.062	83.0248	62.2454	47.6778	39.2578	15.9613	1.43548e+07	25.5019	0.625889	7.73692	5.78376	4.33621	3.32138	2.73482	74.7554	56.0456	42.929	35.3476	0.0894782	18.4117
Marginal	6	106.59	82.9359	66.5719	53.2616	44.7753	18.2046	6.78107e+06	12.0468	1.51115	15.7188	12.2305	9.81731	7.85445	6.60298	77.808	62.4558	49.9685	42.0068	0.135511	118.292
Tropical	7	158.483	123.002	104.28	84.8115	71.3588	29.0129	1.22638e+07	21.7871	1.33166	12.9229	10.0297	8.5031	6.91562	5.81866	77.6122	65.7988	53.5145	45.026	0.18699	57.6607
	Total	574.026	442.922	366.584	294.176	245.956		5.62893e+07			10.1978	7.86868	6.5125	5.22614	4.36949	77.1606	63.8618	51.2477	42.8474
	Overall total	574.857	443.501	367.022	294.515	246.238

## Sheet: AgeHorizon_45_MARCAT
Years below zbio
		TOC flux (TgC y-1)					Frac Total	Area		Burial / Area	Avg TOC flux (tC km-2 y-1)					BE (%)				Mean SAR	OM initial age	MEAN POR	Mean zmix	Mean Dbio
MARCAT	Polynom-ID	SWI	1 years	100 years	1000 years	5000 years	At 5 ky	Size (km2)	Frac Total		SWI	1 years	100 years	1000 years	5000 years	1 years	100 years	1000 years	5000 years	cm/yr	years	%	cm	cm2/yr
4	1	6.63185	5.59305	4.76379	3.78519	3.13335	1.27395	812148	1.44281	0.882965	8.16582	6.88674	5.86567	4.66071	3.85811	84.3362	71.832	57.0759	47.247	0.0789152	57.3908	74.4612	3.82358	17.2347
1	2	7.82904	6.3534	5.51497	4.38449	3.62533	1.47398	1.22204e+06	2.17099	0.678942	6.40655	5.19903	4.51294	3.58785	2.96663	81.1517	70.4425	56.0029	46.3062	0.0535537	48.9269	74.0023	3.84319	12.6853
7	3	8.82457	7.89724	7.03492	5.7646	4.82272	1.96081	1.37585e+06	2.44426	0.802212	6.41388	5.73988	5.11313	4.18983	3.50526	89.4915	79.7197	65.3244	54.6511	0.0677318	57.6553	76.8686	2.54431	7.25689
1	4	7.97403	6.71155	6.05383	4.93432	4.10276	1.66809	1.3391e+06	2.37897	0.701182	5.95476	5.01198	4.52082	3.6848	3.06381	84.1677	75.9194	61.8799	51.4515	0.0471452	70.8491	75.9038	3.05531	7.58306
4	5	4.08888	3.18247	2.59042	2.01031	1.67151	0.6796	667512	1.18586	0.573086	6.12555	4.76766	3.8807	3.01165	2.50409	77.8323	63.3527	49.1653	40.8795	0.0736441	22.8473	72.5546	3.35862	11.9853
2	6	5.90617	3.71439	2.8723	2.26198	1.88535	0.766539	1.07681e+06	1.91299	0.400702	5.48489	3.44944	2.66742	2.10063	1.75086	62.8899	48.6322	38.2986	31.9216	0.0811391	25.9926	72.0023	4.96233	19.4451
7	7	26.0516	15.8924	12.5082	9.90351	8.49243	3.45283	776021	1.37863	2.50454	33.5708	20.4794	16.1184	12.7619	10.9436	61.0036	48.0132	38.0149	32.5985	0.597878	26.4047	71.4389	21.7434	35.3553
7	8	20.3504	17.2829	15.1014	12.2901	10.2967	4.1864	1.95123e+06	3.46644	1.2077	10.4295	8.8574	7.73941	6.29862	5.27702	84.9262	74.2068	60.3922	50.5969	0.154914	70.8669	71.0794	5.31053	21.4138
6	9	12.9681	10.0173	7.83346	6.12017	5.08874	2.06897	832276	1.47857	1.3993	15.5815	12.0361	9.41209	7.35353	6.11424	77.2457	60.4054	47.1939	39.2403	0.176494	47.2091	71.5787	2.78512	32.0354
2	10	18.3823	15.6274	13.4877	11.0695	9.33497	3.79539	1.26507e+06	2.24745	1.68876	14.5306	12.353	10.6616	8.75014	7.37902	85.0134	73.3734	60.2186	50.7825	0.221566	50.7442	69.5393	6.00841	30.3431
4	11	3.84051	2.65363	2.02854	1.54721	1.27159	0.517002	360889	0.641134	0.806387	10.6418	7.35302	5.62094	4.28721	3.5235	69.0957	52.8195	40.2865	33.1101	0.125156	13.3561	70.2523	4.27192	49.3368
6	12	9.97709	5.90602	4.08158	3.0846	2.5428	1.03385	684666	1.21634	0.849969	14.5722	8.62613	5.96141	4.50527	3.71393	59.1958	40.9095	30.9169	25.4864	0.110703	5.34769	70.6091	3.86358	86.5676
5	13	20.4476	15.1762	11.436	8.82388	7.28009	2.95992	2.8489e+06	5.06119	0.584828	7.17736	5.32705	4.01417	3.09729	2.5554	74.2202	55.9282	43.1536	35.6037	0.0604578	23.735	64.9299	2.65568	44.2887
5	14	5.87278	5.21504	4.17955	3.23644	2.66082	1.08183	929050	1.65049	0.65546	6.32128	5.6133	4.49874	3.4836	2.86403	88.8001	71.1682	55.1091	45.3077	0.0776113	23.6051	62.9886	1.62636	42.0079
5	15	2.49015	2.20371	1.78025	1.37181	1.12714	0.458272	550025	0.97714	0.468993	4.52734	4.00657	3.23668	2.49408	2.04926	88.4971	71.4918	55.0892	45.2641	0.0758683	21.6043	69.6117	1.3166	15.8518
5	16	3.35949	3.06783	2.45668	1.88667	1.54956	0.630015	478981	0.850927	0.740387	7.01384	6.40492	5.12899	3.93893	3.23511	91.3183	73.1267	56.1594	46.1248	0.109665	22.4506	68.6492	1.30113	28.5271
4	17	4.39533	3.48282	2.62039	2.00137	1.64618	0.6693	688448	1.22305	0.547237	6.3844	5.05894	3.80623	2.90707	2.39115	79.2391	59.6176	45.534	37.453	0.101621	13.3517	68.6836	2.06525	34.4559
6	18	19.0748	15.6484	11.593	8.90778	7.64239	3.10722	310216	0.55111	5.63812	61.4888	50.4436	37.3708	28.7148	24.6357	82.0371	60.7767	46.6992	40.0654	0.340311	10.1356	81.6474	4.96796	93.564
1	19	2.54571	2.04005	1.81075	1.47364	1.22783	0.499208	515384	0.915599	0.545225	4.93944	3.95832	3.5134	2.8593	2.38236	80.1369	71.1295	57.8871	48.2313	0.0596729	39.4249	67.4389	3.31527	7.14998
6	20	15.3216	9.54822	7.13653	5.45019	4.48331	1.82281	2.30914e+06	4.10228	0.444341	6.63517	4.13496	3.09055	2.36027	1.94155	62.3189	46.5784	35.5721	29.2614	0.0820556	14.2307	67.8807	5.3428	30.7484
6	21	14.931	14.2243	13.214	11.5625	9.91566	4.03149	342734	0.60888	6.62115	43.5642	41.5026	38.5546	33.7359	28.931	95.2675	88.5005	77.4395	66.4101	0.230089	602.033	76.6344	5.50793	28.6302
1	22	3.28587	0.83643	0.608413	0.465747	0.384562	0.156354	937552	1.6656	0.0938729	3.50473	0.892143	0.648937	0.496769	0.410177	25.4554	18.516	14.1742	11.7035	0.0127166	26.7383	72.1132	5.04904	13.4483
7	23	7.3318	3.91402	3.33546	2.66481	2.20561	0.896754	1.6305e+06	2.89664	0.309584	4.49667	2.40051	2.04567	1.63436	1.35273	53.3841	45.493	36.3459	30.0828	0.0259606	42.3392	75.557	4.20263	13.8878
1	24	2.02487	1.31177	1.03013	0.788124	0.649016	0.263875	605792	1.07621	0.245189	3.34251	2.16538	1.70047	1.30098	1.07135	64.7831	50.8739	38.9223	32.0523	0.0143027	25.8151	75.2171	1.53908	27.693
2	25	4.63351	1.57601	1.26441	0.975077	0.80115	0.32573	1.96666e+06	3.49384	0.0932297	2.35603	0.801364	0.642923	0.495804	0.407366	34.0133	27.2884	21.044	17.2904	0.0140497	18.4149	74.6027	5.02382	9.04524
7	26	2.8692	1.66726	1.48822	1.21298	1.01072	0.410936	682629	1.21272	0.338856	4.20317	2.44241	2.18014	1.77692	1.48063	58.1087	51.8689	42.2758	35.2265	0.0330294	34.8744	71.9413	6.16292	8.04203
3	27	21.3743	19.2178	17.7434	14.8369	12.4246	5.05155	1.5779e+06	2.80319	1.80207	13.546	12.1794	11.245	9.40296	7.87414	89.9109	83.0129	69.4149	58.1287	0.119492	113.208	71.0273	4.3236	13.5707
6	28	8.17985	6.08671	5.12679	4.10446	3.4064	1.38496	387656	0.688685	2.01103	21.1008	15.7013	13.2251	10.5879	8.78718	74.411	62.6758	50.1776	41.6437	0.1689	65.9893	67.7891	6.88811	59.0678
6	29	6.03604	4.98066	3.33599	2.53379	2.14346	0.871482	88637.2	0.157467	5.53437	68.0982	56.1916	37.6364	28.586	24.1824	82.5155	55.2679	41.9777	35.511	0.863008	3.40759	62.5567	8.18944	94.0847
3	30	5.91859	2.21783	1.65969	1.29431	1.07037	0.435189	875408	1.5552	0.279829	6.76095	2.53348	1.8959	1.47852	1.22271	37.4723	28.0419	21.8685	18.0849	0.0402361	26.8639	69.9602	6.40053	27.1431
3	31	9.26173	7.10526	6.31543	5.11454	4.25749	1.731	871530	1.54831	1.118	10.627	8.15262	7.24636	5.86846	4.88507	76.7163	68.1884	55.2223	45.9686	0.117059	59.2034	71.9023	7.76346	11.0959
3	32	24.5148	20.0216	17.8106	14.6352	12.2798	4.99267	1.7953e+06	3.18942	1.56539	13.655	11.1522	9.92068	8.15193	6.83994	81.6714	72.6525	59.6993	50.0912	0.155229	58.4417	72.6916	6.14313	23.6528
1	33	0.536816	0.148244	0.118164	0.0903518	0.0740433	0.0301043	366509	0.651117	0.0462349	1.46467	0.404475	0.322405	0.24652	0.202023	27.6154	22.0121	16.8311	13.7931	0.00713398	12.1733	75.4794	3.16111	9.72867
4	34	3.22499	1.95152	1.41037	1.08107	0.8911	0.362301	857354	1.52312	0.237868	3.76156	2.27622	1.64503	1.26094	1.03936	60.5126	43.7327	33.5218	27.6311	0.0482996	14.5258	71.2441	3.39292	18.4859
2	35	1.75995	0.873324	0.728391	0.567607	0.467688	0.190151	874737	1.554	0.122362	2.01198	0.998384	0.832697	0.648888	0.534661	49.6221	41.387	32.2513	26.5739	0.0264793	11.9285	74.7521	3.42253	4.0424
4	36	11.2298	9.4844	8.14	6.44498	5.33962	2.17097	1.44297e+06	2.56349	0.846879	7.78243	6.57283	5.64114	4.46646	3.70043	84.4572	72.4855	57.3916	47.5485	0.111559	32.8493	70.2887	3.17216	26.9489
7	37	63.2969	54.2284	47.6763	39.2694	33.0562	13.4399	3.43302e+06	6.09889	2.20367	18.4377	15.7961	13.8876	11.4387	9.6289	85.6731	75.3218	62.0401	52.2241	0.260574	83.7706	70.789	6.5861	23.2932
7	38	29.7588	22.1202	17.1356	13.7061	11.4743	4.66521	2.41451e+06	4.28948	1.08759	12.325	9.16135	7.0969	5.67655	4.75224	74.3317	57.5816	46.0574	38.5579	0.196455	38.8073	73.1093	5.50249	40.375
2	39	39.3652	31.9055	28.0572	23.0521	19.3411	7.86368	2.099e+06	3.72895	2.10882	18.7543	15.2004	13.3669	10.9824	9.21447	81.05	71.2741	58.5596	49.1326	0.341542	94.7016	70.5791	7.0451	19.5303
6	40	9.01675	8.22852	7.53365	6.19224	5.15561	2.09616	704261	1.25115	1.67539	12.8031	11.6839	10.6972	8.79253	7.32059	91.2582	83.5518	68.6749	57.1782	0.0885738	124.5	75.7232	5.30139	16.1355
6	41	11.0853	8.29569	6.71689	5.30592	4.39691	1.78769	1.12148e+06	1.99236	0.897271	9.88445	7.39707	5.98929	4.73116	3.92062	74.8354	60.593	47.8647	39.6645	0.105189	33.0232	80.617	5.13926	47.5838
4	42	9.16655	7.95039	6.8573	5.6106	4.68431	1.90454	671506	1.19296	1.59649	13.6507	11.8396	10.2118	8.35525	6.97583	86.7326	74.8078	61.2073	51.1022	0.164786	90.912	74.6571	2.91057	36.7992
5	43	31.206	17.0271	10.9259	8.25544	6.84026	2.7811	2.24326e+06	3.98524	0.69785	13.911	7.59032	4.87052	3.68011	3.04925	54.5634	35.012	26.4546	21.9197	0.0832388	8.66809	67.6762	4.32223	66.6116
5	44	18.9798	14.9992	11.2266	8.55076	7.02397	2.85579	2.0027e+06	3.55788	0.802666	9.47709	7.48949	5.60573	4.26961	3.50724	79.0273	59.1503	45.0519	37.0076	0.0658663	15.8793	61.5494	1.79129	67.1764
5	45	28.7061	25.3357	20.2404	15.5528	12.7759	5.1944	5.30188e+06	9.41899	0.551481	5.41432	4.77862	3.8176	2.93345	2.40969	88.2588	70.5092	54.1794	44.5059	0.118299	22.0218	67.3273	1.82312	18.3487
	Total	574.026	442.922	366.584	294.176	245.956		5.62893e+07			10.1978	7.86868	6.5125	5.22614	4.36949	77.1606	63.8618	51.2477	42.8474	0.123653	45.1509	70.7838	4.45176	27.884
																				Area weighted global mean
	Overall total	574.857	443.501	367.022	294.515	246.238
MARCATS Index	Code
1	EBC
2	WBC
3	Indian
4	Sub-Polar
5	Polar
6	Marginal
7	Tropical

## Sheet: AgeHorizon_RECCAP
years below zbio
			TOC flux (TgC y-1)					Frac Total	Area		Burial / Area	Avg TOC flux (tC km-2 y-1)					BE (%)				Mean SAR	OM initial age
Description	Short	OBJECTID	SWI	1 years	100 years	1000 years	5000 years	At 5 ky	Size (km2)	Frac Total		SWI	1 years	100 years	1000 years	5000 years	1 years	100 years	1000 years	5000 years	cm/yr	years
'North_America'	NAM	1	108.108	86.0127	70.6152	56.1298	46.7081	19.0619	1.18342e+07	21.0593	0.905154	9.1352	7.26814	5.96704	4.74302	3.94687	79.5619	65.3192	51.9202	43.2051	0.105701	42.9486
'South_America'	SAM	2	51.401	35.6608	29.3889	23.4854	19.8206	8.08893	4.7321e+06	8.4209	0.960577	10.8622	7.53593	6.21053	4.963	4.18854	69.3775	57.1756	45.6906	38.5607	0.158905	51.1315
'Europe'	EUR	3	49.4743	39.8881	31.2917	24.5842	20.6948	8.44569	4.18068e+06	7.43964	1.13523	11.834	9.54105	7.48483	5.88042	4.9501	80.6238	63.2483	49.6908	41.8294	0.103483	64.6838
'Africa'	AFR	4	30.0174	16.0593	13.3759	10.6394	8.81309	3.59669	7.18455e+06	12.7851	0.281318	4.17804	2.23526	1.86176	1.48087	1.22667	53.5001	44.5605	35.4441	29.36	0.0281955	31.7985
'North_Asia'	NAS	5	72.1184	50.552	38.1884	30.1145	25.0567	10.2258	5.75618e+06	10.2433	0.998296	12.5289	8.78223	6.63433	5.23168	4.35301	70.0959	52.9523	41.757	34.7438	0.0948993	65.6908
'Central_Asia'	CAS	6	33.312	28.9453	25.0386	20.6664	17.3642	7.08645	1.58831e+06	2.82644	2.5072	20.9733	18.224	15.7643	13.0116	10.9325	86.8915	75.1639	62.0389	52.1259	0.198622	197.326
'East_Asia'	EAS	7	35.4029	28.6548	24.5982	19.9347	16.6379	6.79003	1.91528e+06	3.4083	1.99221	18.4845	14.9612	12.8431	10.4083	8.68691	80.9391	69.4807	56.3081	46.9957	0.263799	120.612
'South_Asia'	SAS	8	14.8319	8.87668	7.52991	6.04819	5.0269	2.05151	1.70663e+06	3.037	0.675507	8.69073	5.20129	4.41215	3.54394	2.94551	59.8487	50.7685	40.7784	33.8926	0.0757494	41.2214
'South_East_Asia'	SEA	9	120.325	99.9138	87.0378	71.6275	60.2174	24.5751	7.70687e+06	13.7146	1.7919	15.6126	12.9643	11.2935	9.29399	7.81347	83.0369	72.3358	59.5286	50.0457	0.229292	70.1154
'Oceania'	AUS	10	27.4694	21.1484	17.9572	14.364	11.9501	4.8769	4.30885e+06	7.66772	0.636031	6.37512	4.90814	4.16751	3.33362	2.77338	76.9889	65.3714	52.291	43.5031	0.0894101	26.6198
'Antarctica'	ANT	11	28.5143	25.2637	20.1891	15.5138	12.744	5.2009	5.28101e+06	9.39772	0.553422	5.3994	4.78388	3.82297	2.93766	2.41316	88.6002	70.8036	54.4072	44.6932	0.118293	22.0824
		Total	570.974	440.976	365.211	293.108	245.034		5.61947e+07			10.1606	7.84729	6.49903	5.21594	4.36044	77.2322	63.9628	51.3347	42.915
		Overall total	574.857	443.501	367.022	294.515	246.238

## Sheet: Age_Horizon_EEZs
Years below zbio
				TOC flux (TgC y-1)					Frac Total	Area		Burial / Area	Avg TOC flux (tC km-2 y-1)				BE (%)				Mean SAR	OM initial age
SOVEREIGN1	Code	UN_SOV1	COUNTRY_ID	SWI	1 years	100 years	1000 years	5000 years	at 5ky	Size (km2)	Frac Total		1 years	100 years	1000 years	5000 years	1 years	100 years	1000 years	5000 years	cm/yr	years
Albania	ALB	8	1	0.110434	0.0819887	0.0582057	0.0441119	0.0362841	0.0148888	9356.33	0.0172534	0.862949	8.76291	6.221	4.71465	3.87803	74.2423	52.7064	39.9441	32.8559	0.167356	9.0373
Algeria	DZA	12	2	0.490907	0.359854	0.292701	0.225244	0.184945	0.0758904	107549	0.198324	0.382659	3.34596	2.72156	2.09434	1.71964	73.3039	59.6245	45.8831	37.6742	0.0670903	21.6905
Angola	AGO	24	3	1.23493	0.755564	0.643371	0.503463	0.414467	0.170072	403946	0.744892	0.228318	1.87046	1.59272	1.24636	1.02604	61.1828	52.0978	40.7686	33.562	0.0143345	40.126
Antarctica	ATA	10	4	27.1534	24.231	19.3655	14.8815	12.2247	5.01629	4.69852e+06	8.66424	0.578965	5.15716	4.12162	3.16727	2.60183	89.2374	71.3189	54.8051	45.0209	0.127526	22.7084
Antigua and Barbuda	ATG	28	5	0.517601	0.483693	0.391503	0.306501	0.256631	0.105306	11031.7	0.0203428	5.17656	43.8458	35.4891	27.7837	23.2631	93.449	75.6381	59.2156	49.5808	0.978322	42.9043
Argentina	ARG	32	6	1.5206	1.11278	0.848902	0.657197	0.560806	0.230121	96186.7	0.177372	1.29739	11.569	8.82556	6.83251	5.83039	73.1806	55.8269	43.2197	36.8807	0.182608	15.8793
Australia	AUS	36	7	11.986	6.88485	5.07907	3.9023	3.21914	1.32094	2.82118e+06	5.20237	0.253912	2.44041	1.80033	1.38322	1.14106	57.4405	42.3748	32.5571	26.8574	0.052975	16.023
Azerbaijan	AZE	31	8	0	0	0	0	0	0	0	0	0	0	0	0	0	0	0	0	0	NaN	NaN
Bahamas	BHS	44	9	5.7925	4.80581	3.94771	3.11963	2.61638	1.07361	254031	0.468443	2.29186	18.9182	15.5403	12.2805	10.2994	82.9661	68.1522	53.8563	45.1684	0.297258	54.11
Bahrain	BHR	48	10	0.0771378	0.0629036	0.0398114	0.030141	0.0253757	0.0104127	1374.69	0.00253498	4.1076	45.7583	28.9602	21.9256	18.4592	81.547	51.6107	39.0742	32.8966	0.808237	2.30109
Bangladesh	BGD	50	11	1.62586	1.03131	0.895622	0.724264	0.603904	0.247806	53489.5	0.0986367	2.51231	19.2806	16.7439	13.5403	11.2901	63.4314	55.0859	44.5464	37.1436	0.311498	102.781
Barbados	BRB	52	12	0.0114654	0.00222276	0.00180531	0.00138015	0.00113087	0.000464039	3762.11	0.00693748	0.0668888	0.590828	0.479866	0.366854	0.300593	19.3866	15.7457	12.0374	9.86325	0.0133684	15.3647
Belgium	BEL	56	13	0	0	0	0	0	0	0	0	0	0	0	0	0	0	0	0	0	NaN	NaN
Belize	BLZ	84	14	0.221046	0.1771	0.146656	0.113858	0.0941695	0.0386415	31642.2	0.0583494	0.662243	5.59697	4.63481	3.59831	2.97607	80.1192	66.3461	51.5089	42.6017	0.105944	27.5959
Benin	BEN	204	15	0.179058	0.160833	0.152177	0.128213	0.107224	0.0439982	26059.8	0.0480552	0.915578	6.1717	5.83954	4.91997	4.11454	89.8218	84.9876	71.6044	59.8822	0.0603821	119.044
Bosnia and Herzegovina	BIH	70	16	0	0	0	0	0	0	0	0	0	0	0	0	0	0	0	0	0	NaN	NaN
Brazil	BRA	76	17	24.1044	14.9858	12.0701	9.60239	8.20257	3.36584	1.55166e+06	2.86132	1.17632	9.65794	7.77881	6.18846	5.28631	62.1705	50.0741	39.8366	34.0293	0.280036	26.4394
Brunei	BRN	96	18	0.0801964	0.0276885	0.0202325	0.0153961	0.012623	0.00517974	27549.5	0.0508022	0.101959	1.00505	0.734405	0.558853	0.458195	34.5259	25.2287	19.198	15.7402	0.022277	16.3693
Bulgaria	BGR	100	19	1.43105	1.37652	1.29276	1.11979	0.954869	0.391821	29460.6	0.0543264	7.21235	46.7242	43.881	38.0097	32.4117	96.1898	90.3364	78.2494	66.7251	0.249513	470.248
Cambodia	KHM	116	20	0.715283	0.452522	0.26746	0.201389	0.1666	0.0683627	43172	0.0796108	0.858711	10.4818	6.19522	4.66481	3.85898	63.2649	37.3923	28.1552	23.2915	0.244372	1.24722
Cameroon	CMR	120	21	0.157972	0.0732263	0.0545032	0.0417063	0.0343025	0.0140757	9215.54	0.0169938	0.828284	7.94595	5.91427	4.52565	3.72224	46.3539	34.5017	26.401	21.7143	0.106306	17.0349
Canada	CAN	124	22	29.7326	21.2195	15.9651	12.2605	10.108	4.1477	3.24778e+06	5.98903	0.69255	6.53353	4.9157	3.77505	3.11227	71.3676	53.6956	41.236	33.9962	0.0850755	19.1741
Cape Verde	CPV	132	23	0.0435547	0.00244844	0.00221223	0.0017292	0.00141916	0.00058234	27483	0.0506797	0.0114906	0.0890891	0.0804945	0.0629189	0.0516378	5.62152	5.07921	3.97019	3.25835	0.00211679	15.8957
Chile	CHL	152	24	6.1025	4.92691	4.37592	3.52596	2.92194	1.19899	1.28125e+06	2.36267	0.507473	3.8454	3.41536	2.75198	2.28054	80.7358	71.7069	57.779	47.881	0.0514514	51.9177
China	CHN	156	25	8.49151	4.84967	3.08807	2.37856	2.02047	0.829081	273342	0.504054	1.64483	17.7421	11.2975	8.70178	7.39173	57.1119	36.3666	28.0111	23.794	0.579273	25.7596
Colombia	COL	170	26	3.93939	3.43274	3.08066	2.54843	2.14856	0.881639	430623	0.794085	1.11026	7.97155	7.15395	5.91801	4.98941	87.1387	78.2013	64.691	54.5403	0.106475	65.1952
Comores	COM	174	27	0.154276	0.0123697	0.0109956	0.00861676	0.00707144	0.0029017	92662.4	0.170873	0.0169816	0.133492	0.118663	0.0929909	0.0763141	8.01789	7.12722	5.58527	4.58362	0.00225703	24.8488
Costa Rica	CRI	188	28	1.24952	1.20906	1.08238	0.873788	0.732184	0.300444	213593	0.393874	0.762793	5.66058	5.06749	4.09089	3.42793	96.7623	86.624	69.9299	58.5972	0.0810354	44.4097
Croatia	HRV	191	29	0.590438	0.386792	0.269327	0.203762	0.167927	0.0689073	39043.7	0.0719981	0.957071	9.90664	6.89809	5.21881	4.301	65.5094	45.6148	34.5103	28.4411	0.185852	6.32667
Cuba	CUB	192	30	3.37051	3.05516	2.79843	2.32051	1.93979	0.795974	309607	0.570926	1.39418	9.86787	9.03866	7.49502	6.26534	90.6438	83.0268	68.8473	57.5518	0.145281	113.39
Cyprus	CYP	196	31	0.390847	0.223612	0.175426	0.133952	0.109923	0.0451059	95527.4	0.176156	0.256057	2.34082	1.83639	1.40224	1.1507	57.2123	44.8834	34.2723	28.1244	0.0584359	14.3896
Democratic Republic of the Congo	COD	180	32	0.106743	0.045824	0.0343256	0.0260669	0.0214175	0.00878846	12233.8	0.0225596	0.389566	3.74568	2.80579	2.13072	1.75068	42.9294	32.1573	24.4203	20.0646	0.0229029	20.5028
Denmark	DNK	208	33	9.25647	8.06282	6.4237	4.96359	4.08317	1.67549	1.4738e+06	2.71773	0.616501	5.47079	4.35861	3.36789	2.77051	87.1047	69.3969	53.6229	44.1115	0.0829269	22.3963
Djibouti	DJI	262	34	0.162289	0.135853	0.121331	0.0981601	0.0813761	0.0333919	5271.32	0.00972051	3.4352	25.772	23.0172	18.6215	15.4375	83.7101	74.7621	60.4846	50.1426	0.163665	92.0144
Dominica	DMA	212	35	0.0432297	0.0427898	0.0393012	0.0318653	0.0266929	0.0109532	741.576	0.00136749	8.00966	57.7012	52.9969	42.9697	35.9948	98.9823	90.9125	73.7115	61.7466	1.00622	99.401
Dominican Republic	DOM	214	36	5.35105	4.94529	4.68218	4.01455	3.4204	1.40353	248417	0.45809	3.06387	19.9072	18.8481	16.1606	13.7688	92.4172	87.5002	75.0236	63.9201	0.341992	143.425
East Timor	TLS	626	37	0.308198	0.239601	0.210188	0.173408	0.145133	0.059554	43257.6	0.0797687	0.746584	5.53894	4.85898	4.00872	3.35509	77.7426	68.1989	56.2649	47.0909	0.0837482	46.97
Ecuador	ECU	218	38	0.765067	0.662917	0.570197	0.452706	0.37531	0.154005	192230	0.35448	0.434453	3.44856	2.96622	2.35502	1.9524	86.6482	74.5291	59.172	49.0559	0.0473109	30.6622
Egypt	EGY	818	39	1.77813	1.18398	0.930669	0.726631	0.599488	0.245994	221767	0.408946	0.601531	5.33885	4.19661	3.27656	2.70324	66.5856	52.3397	40.8648	33.7145	0.0787252	34.3943
El Salvador	SLV	222	40	0.129363	0.122916	0.105792	0.0827832	0.0681148	0.0279502	48943.9	0.0902543	0.309683	2.51136	2.16149	1.69139	1.39169	95.0161	81.7788	63.9928	52.6539	0.0308513	35.3565
Equatorial Guinea	GNQ	226	41	0.568175	0.387968	0.317443	0.246077	0.202476	0.0830838	84548.2	0.15591	0.532896	4.58872	3.75457	2.9105	2.39479	68.2832	55.8706	43.3102	35.6362	0.0592017	27.7623
Eritrea	ERI	232	42	1.49463	0.771975	0.556929	0.429067	0.354218	0.14535	58480.6	0.10784	1.34782	13.2005	9.52331	7.33692	6.05701	51.6498	37.2619	28.7072	23.6993	0.179154	15.8355
Estonia	EST	233	43	1.1874	0.910082	0.658375	0.504024	0.429441	0.176217	22237.5	0.0410067	4.29727	40.9257	29.6066	22.6655	19.3116	76.6448	55.4467	42.4476	36.1664	0.299036	8.07935
Federal Republic of Somalia	SOM	706	44	5.51228	4.79211	4.45495	3.7172	3.11143	1.27674	642965	1.18565	1.07683	7.45314	6.92876	5.78134	4.83918	86.9352	80.8187	67.4349	56.4454	0.0769997	77.2931
Fiji	FJI	242	45	0	0	0	0	0	0	0	0	0	0	0	0	0	0	0	0	0	NaN	NaN
Finland	FIN	246	46	5.88497	5.06483	3.71164	2.85141	2.46063	1.00969	66477	0.122586	8.23662	76.1893	55.8334	42.8931	37.0148	86.0638	63.0697	48.4523	41.8121	0.513762	9.49864
France	FRA	250	47	3.10774	2.01282	1.60513	1.25179	1.04639	0.429375	533654	0.984078	0.436322	3.77177	3.00781	2.34569	1.9608	64.7679	51.6494	40.2796	33.6704	0.0766534	22.0779
Gabon	GAB	266	48	0.295252	0.0948154	0.0753821	0.0577509	0.0473577	0.0194328	139752	0.257708	0.0754062	0.678455	0.539399	0.413238	0.33887	32.1133	25.5314	19.5598	16.0397	0.00883305	21.9702
Gambia	GMB	270	49	0.0292256	0.00665166	0.00587439	0.00461952	0.00379774	0.00155837	14236.9	0.0262533	0.0593589	0.467214	0.412618	0.324476	0.266754	22.7597	20.1002	15.8064	12.9946	0.00449627	35.7439
Georgia	GEO	268	50	0.726387	0.711827	0.681041	0.590724	0.501554	0.205808	15967.9	0.0294453	6.98948	44.5787	42.6507	36.9946	31.4102	97.9955	93.7572	81.3236	69.0478	0.262471	394.322
Germany	DEU	276	51	0.207083	0.108775	0.0729139	0.0550972	0.0455265	0.0186813	6288.68	0.0115966	1.61094	17.2969	11.5945	8.76133	7.23944	52.527	35.21	26.6063	21.9847	0.123228	4.7411
Ghana	GHA	288	52	1.09173	0.883674	0.786175	0.651835	0.544207	0.22331	143504	0.264627	0.843867	6.15783	5.47841	4.54227	3.79227	80.9422	72.0115	59.7064	49.848	0.0628481	100.624
Greece	GRC	300	53	2.87728	1.92071	1.43455	1.09097	0.896295	0.367786	459469	0.847277	0.434079	4.18028	3.12219	2.37442	1.95072	66.7543	49.8577	37.9168	31.1507	0.0866564	12.1973
Grenada	GRD	308	54	0.132041	0.080347	0.0625473	0.0477867	0.0392228	0.0160947	21819	0.040235	0.400017	3.68243	2.86665	2.19014	1.79765	60.85	47.3696	36.1908	29.705	0.0738978	16.9019
Guatemala	GTM	320	55	0.119787	0.11481	0.0983173	0.0768761	0.0632667	0.0259609	58557.6	0.107982	0.240417	1.96063	1.67898	1.31283	1.08042	95.8456	82.0771	64.1776	52.8162	0.0244242	34.273
Guinea	GIN	324	56	1.04372	0.0868402	0.0579188	0.0439033	0.0362358	0.014869	75181.5	0.138638	0.107251	1.15507	0.770387	0.583964	0.481978	8.32029	5.54929	4.20644	3.47181	0.0190178	15.3569
Guinea-Bissau	GNB	624	57	0.947543	0.313924	0.199574	0.151203	0.125944	0.0516799	55178.6	0.101751	0.507903	5.68924	3.61687	2.74025	2.28248	33.1303	21.0622	15.9574	13.2916	0.078006	27.7862
Guyana	GUY	328	58	1.79021	1.03057	0.793745	0.619407	0.518568	0.212789	85955.5	0.158505	1.34248	11.9896	9.23437	7.20614	6.03299	57.5669	44.338	34.5996	28.9669	0.325031	25.9152
Haiti	HTI	332	59	2.32049	2.21842	2.05426	1.71387	1.44355	0.592348	103229	0.190358	3.11176	21.4903	19.9	16.6027	13.984	95.6014	88.5268	73.8583	62.209	0.376433	123.864
Honduras	HND	340	60	0.629365	0.507041	0.385658	0.305175	0.252801	0.103734	176885	0.326182	0.318026	2.8665	2.18028	1.72528	1.42919	80.5639	61.2774	48.4894	40.1677	0.0565634	36.8921
Iceland	ISL	352	61	2.26962	1.94944	1.51636	1.15761	0.950455	0.39001	442700	0.816356	0.477745	4.40353	3.42524	2.61488	2.14695	85.8927	66.8109	51.0044	41.8772	0.0920396	15.3565
India	IND	356	62	10.5558	6.27092	5.2651	4.20639	3.49215	1.43297	1.16695e+06	2.15191	0.665906	5.37375	4.51182	3.60459	2.99253	59.4076	49.8789	39.8492	33.0829	0.0788632	40.8698
Indonesia	IDN	360	63	58.8784	50.4653	44.3694	36.6402	30.8562	12.6615	3.63364e+06	6.70057	1.88962	13.8883	12.2107	10.0836	8.49181	85.711	75.3577	62.2304	52.4067	0.225952	71.9575
Iran	IRN	364	64	5.9545	5.21772	4.00242	3.17844	2.68031	1.09984	112927	0.208242	5.28153	46.2042	35.4425	28.1459	23.7348	87.6265	67.2168	53.3788	45.0131	0.588529	147.172
Iraq	IRQ	368	65	0	0	0	0	0	0	0	0	0	0	0	0	0	0	0	0	0	NaN	NaN
Ireland	IRL	372	66	0.465614	0.389088	0.304922	0.234438	0.192671	0.0790608	130305	0.240288	0.329026	2.98597	2.34006	1.79915	1.47862	83.5645	65.4882	50.3504	41.3801	0.0703017	18.4395
Israel	ISR	376	67	0.101078	0.0559197	0.0427635	0.032518	0.026659	0.0109392	20812.2	0.0383785	0.285036	2.68687	2.05473	1.56245	1.28093	55.3232	42.3073	32.1712	26.3746	0.0602528	13.4103
Italy	ITA	380	68	3.13148	2.08236	1.55572	1.18448	0.973359	0.399408	496209	0.915028	0.436498	4.19654	3.1352	2.38706	1.96159	66.4979	49.68	37.8251	31.0831	0.0860445	13.8853
Ivory Coast	CIV	384	69	0.546392	0.405658	0.368402	0.299549	0.248363	0.101913	121290	0.223664	0.455655	3.34452	3.03736	2.46969	2.04768	74.243	67.4245	54.8232	45.4551	0.0358905	57.8401
Jamaica	JAM	388	70	2.66921	2.3108	2.18444	1.85818	1.57872	0.647811	197240	0.363718	1.78108	11.7157	11.075	9.42091	8.00404	86.5723	81.8383	69.6154	59.1455	0.185698	115.074
Japan	JPN	392	71	18.9767	17.3026	15.8182	12.9563	10.7926	4.42863	1.15931e+06	2.13782	2.07157	14.9249	13.6445	11.1759	9.30946	91.1781	83.3561	68.2749	56.8728	0.210446	135.813
Jordan	JOR	400	72	0	0	0	0	0	0	0	0	0	0	0	0	0	0	0	0	0	NaN	NaN
Kazakhstan	KAZ	398	73	0	0	0	0	0	0	0	0	0	0	0	0	0	0	0	0	0	NaN	NaN
Kenya	KEN	404	74	0.525844	0.404937	0.35121	0.276416	0.227949	0.0935365	121346	0.223767	0.418008	3.33703	2.89428	2.27791	1.87849	77.0069	66.7897	52.5662	43.3491	0.0483226	31.9959
Kiribati	KIR	296	75	0	0	0	0	0	0	0	0	0	0	0	0	0	0	0	0	0	NaN	NaN
Kuwait	KWT	414	76	0.0437651	0.0355884	0.0216187	0.0163484	0.013749	0.00564176	675.769	0.00124614	4.52738	52.6636	31.9912	24.1922	20.3457	81.3169	49.3971	37.3548	31.4154	0.904606	1.4271
Latvia	LVA	428	77	0.528543	0.363579	0.263919	0.201119	0.167696	0.0688125	19454	0.0358738	1.91818	18.6892	13.5663	10.3382	8.62016	68.7889	49.9332	38.0515	31.728	0.145889	11.0664
Lebanon	LBN	422	78	0.0819541	0.0541784	0.0430427	0.0328888	0.0269771	0.0110698	17313.3	0.0319264	0.346728	3.12929	2.4861	1.89963	1.55817	66.1082	52.5205	40.1308	32.9173	0.0722366	16.9802
Liberia	LBR	430	79	0.539285	0.307567	0.260145	0.204927	0.168955	0.0693291	170303	0.314045	0.220761	1.806	1.52754	1.20331	0.992085	57.0325	48.2389	37.9997	31.3295	0.0236259	28.084
Libya	LBY	434	80	1.74237	0.851203	0.606424	0.459367	0.377131	0.154752	323325	0.596224	0.259554	2.63265	1.87558	1.42076	1.16641	48.8531	34.8045	26.3645	21.6447	0.0563876	10.1326
Lithuania	LTU	440	81	0.0976067	0.0590622	0.040931	0.0309647	0.0256778	0.0105366	3493.09	0.00644139	1.63577	16.9083	11.7177	8.86454	7.35103	60.5104	41.9346	31.7239	26.3074	0.130456	5.28714
Madagascar	MDG	450	82	2.09769	0.554896	0.454653	0.352524	0.28961	0.118839	999431	1.84299	0.0644815	0.555212	0.454911	0.352725	0.289775	26.4528	21.674	16.8054	13.8062	0.00896676	18.4852
Malaysia	MYS	458	83	3.6198	2.10928	1.26928	0.958594	0.798627	0.327708	271801	0.50121	0.653834	7.76038	4.66989	3.52683	2.93828	58.2705	35.0649	26.482	22.0627	0.220782	8.88072
Maldives	MDV	462	84	0.0354932	0.00163814	0.00149658	0.00117095	0.000959992	0.000393923	19855	0.0366134	0.010759	0.0825052	0.0753756	0.0589751	0.0483501	4.61536	4.21653	3.29908	2.70472	0.00171919	21.8866
Malta	MLT	470	85	0.250902	0.0937427	0.067499	0.051068	0.0418296	0.0171644	52976.7	0.0976911	0.175701	1.76951	1.27413	0.96397	0.789585	37.3622	26.9025	20.3537	16.6717	0.0400057	7.46782
Marshall Islands	MHL	584	86	0	0	0	0	0	0	0	0	0	0	0	0	0	0	0	0	0	NaN	NaN
Mauritania	MRT	478	87	0.430513	0.0748713	0.0636483	0.0493603	0.0405085	0.0166222	131109	0.241769	0.0687526	0.571064	0.485463	0.376484	0.308969	17.3912	14.7843	11.4655	9.40934	0.00609938	30.575
Mexico	MEX	484	88	11.2888	9.71122	8.21988	6.52366	5.39842	2.21519	1.57445e+06	2.90334	0.76298	6.16802	5.22081	4.14346	3.42877	86.025	72.8143	57.7886	47.8209	0.0790474	51.4902
Micronesia	FSM	583	89	0	0	0	0	0	0	0	0	0	0	0	0	0	0	0	0	0	NaN	NaN
Monaco	MCO	492	90	0	0	0	0	0	0	0	0	0	0	0	0	0	0	0	0	0	NaN	NaN
Montenegro	MNE	499	91	0.0744917	0.0533208	0.0369074	0.0278905	0.0229678	0.0094246	5767.17	0.0106349	0.886197	9.24557	6.39956	4.83609	3.9825	71.5795	49.5457	37.4412	30.8327	0.176314	6.53181
Morocco	MAR	504	92	0.482813	0.207677	0.163021	0.12461	0.102181	0.0419288	204151	0.376462	0.111376	1.01727	0.798531	0.610382	0.500515	43.0138	33.7648	25.8091	21.1636	0.0181327	18.7708
Mozambique	MOZ	508	93	2.12925	1.08268	0.910099	0.720626	0.595778	0.244471	470937	0.868425	0.281511	2.299	1.93253	1.5302	1.26509	50.8481	42.7427	33.8442	27.9807	0.0345535	29.6534
Myanmar	MMR	104	94	5.40821	3.31237	2.68619	2.12704	1.76411	0.723885	344343	0.634982	1.14001	9.61937	7.80091	6.17709	5.12311	61.247	49.6688	39.3298	32.6191	0.166237	49.4837
Namibia	NAM	516	95	1.50163	1.04741	0.823045	0.629916	0.518984	0.21296	435364	0.802828	0.265262	2.40582	1.89047	1.44687	1.19207	69.7511	54.8099	41.9487	34.5613	0.0143702	30.2807
Nauru	NRU	520	96	0	0	0	0	0	0	0	0	0	0	0	0	0	0	0	0	0	NaN	NaN
Netherlands	NLD	528	97	0.612897	0.489218	0.397427	0.310234	0.257583	0.105697	62057.6	0.114436	0.923627	7.8833	6.40417	4.99914	4.15071	79.8207	64.8441	50.6177	42.0271	0.160756	26.3573
New Zealand	NZL	554	98	18.226	16.4906	14.6803	11.8666	9.89798	4.06154	1.54712e+06	2.85294	1.42363	10.6589	9.48882	7.67012	6.39769	90.4781	80.5459	65.1078	54.3068	0.179604	45.7302
Nicaragua	NIC	558	99	0.693527	0.482609	0.330864	0.254027	0.20933	0.0858964	168849	0.311365	0.275871	2.85822	1.95952	1.50446	1.23974	69.5876	47.7074	36.6282	30.1833	0.0578742	21.6792
Nigeria	NGA	566	100	0.810273	0.481667	0.378477	0.295152	0.243342	0.0998528	144251	0.266004	0.37538	3.33908	2.62374	2.0461	1.68693	59.445	46.7098	36.4262	30.0321	0.0429146	33.7384
North Korea	PRK	408	101	0.91111	0.829224	0.763847	0.6289	0.522625	0.214454	76249.7	0.140607	1.5252	10.8751	10.0177	8.2479	6.85413	91.0125	83.837	69.0256	57.3614	0.0868572	142.31
Norway	NOR	578	102	7.98529	7.08849	5.66625	4.34965	3.57166	1.4656	989703	1.82505	0.803044	7.16224	5.7252	4.39491	3.60882	88.7693	70.9586	54.4709	44.728	0.0756795	22.2219
Oman	OMN	512	103	3.41208	2.63951	2.33832	1.91421	1.59326	0.65378	414535	0.764417	0.855267	6.36742	5.64083	4.61773	3.8435	77.3579	68.5307	56.1009	46.6948	0.0638448	66.859
Pakistan	PAK	586	104	2.48681	1.97196	1.75135	1.43109	1.19065	0.488572	177922	0.328095	1.48912	11.0833	9.84334	8.04336	6.69198	79.2967	70.4254	57.5472	47.8786	0.129228	76.0913
Palau	PLW	585	105	0.0437564	0.00194	0.00175563	0.00137034	0.0011242	0.000461304	35342.1	0.0651722	0.00707822	0.0548919	0.0496751	0.0387734	0.031809	4.43364	4.01227	3.13174	2.56922	0.00174728	11.7919
Palestine	PSE	275	106	0.00924596	0.00603998	0.0041758	0.0031496	0.0025825	0.0010597	657.483	0.00121242	0.874039	9.18652	6.35119	4.79039	3.92786	65.3257	45.1635	34.0646	27.9312	0.172255	4.61144
Panama	PAN	591	107	3.92668	3.6042	3.08274	2.48911	2.08899	0.857195	262512	0.484082	1.77076	13.7297	11.7432	9.48188	7.95768	91.7875	78.5075	63.3896	53.1998	0.219751	71.5571
Papua New Guinea	PNG	598	108	18.9061	16.8687	15.1683	12.556	10.5527	4.33018	1.01106e+06	1.86444	2.32252	16.6841	15.0024	12.4186	10.4372	89.2236	80.2297	66.4125	55.8162	0.263729	108.076
Peru	PER	604	109	4.39397	3.71764	3.33313	2.71703	2.26192	0.928157	688667	1.26993	0.730875	5.39831	4.83997	3.94534	3.28449	84.6077	75.8569	61.8354	51.4779	0.0401591	72.2904
Philippines	PHL	608	110	21.6682	19.0456	17.7905	14.9306	12.5898	5.16611	1.5292e+06	2.81989	1.83203	12.4546	11.6339	9.76368	8.23298	87.8965	82.1042	68.9055	58.1028	0.258918	77.6142
Poland	POL	616	111	0.709015	0.542052	0.394067	0.299943	0.25082	0.102922	18623.9	0.0343432	2.99685	29.1051	21.1592	16.1053	13.4676	76.4513	55.5794	42.3041	35.3758	0.197703	9.04485
Portugal	PRT	620	112	1.75605	1.50647	1.37039	1.13205	0.94723	0.388686	239628	0.441882	0.879615	6.28672	5.71881	4.72419	3.95292	85.7877	78.0381	64.4656	53.941	0.0930104	55.1807
Qatar	QAT	634	113	0.404648	0.304469	0.194109	0.146758	0.122805	0.0503917	7602.76	0.0140198	3.59433	40.0471	25.5314	19.3032	16.1526	75.2429	47.9698	36.2681	30.3485	0.611233	2.30538
Republic of Mauritius	MUS	480	114	0	0	0	0	0	0	0	0	0	0	0	0	0	0	0	0	0	NaN	NaN
Republic of the Congo	COG	178	115	0.0705676	0.031727	0.0265396	0.0204888	0.0168169	0.00690064	23737.5	0.0437729	0.157646	1.33658	1.11804	0.863139	0.70845	44.9598	37.6088	29.0343	23.8309	0.0114589	29.8904
Romania	ROU	642	116	1.4753	1.25562	1.01912	0.815719	0.683795	0.280589	27166.2	0.0500954	5.60108	46.2201	37.5144	30.027	25.1708	85.1094	69.0788	55.2916	46.3494	0.268734	124.579
Russia	RUS	643	117	66.6432	46.1765	34.3476	26.8991	22.359	9.1748	5.00407e+06	9.22769	0.994269	9.2278	6.86394	5.37545	4.46817	69.2893	51.5396	40.3629	33.5504	0.102517	49.0234
Saint Kitts and Nevis	KNA	659	118	0.099346	0.0959626	0.0816493	0.0635452	0.0527729	0.0216548	2205.17	0.00406642	5.32528	43.5171	37.0263	28.8164	23.9314	96.5943	82.1867	63.9635	53.1203	0.857401	35.4812
Saint Lucia	LCA	662	119	0.0159395	0.00695235	0.0046979	0.00355333	0.00291809	0.00119741	1494.03	0.00275505	0.434623	4.65342	3.14444	2.37835	1.95316	43.6172	29.4734	22.2927	18.3073	0.0962889	7.33921
Saint Vincent and the Grenadines	VCT	670	120	0.0558451	0.0228015	0.0176176	0.0134528	0.0110305	0.00452625	12014.1	0.0221545	0.204304	1.89789	1.46641	1.11975	0.918128	40.8299	31.5473	24.0895	19.752	0.0407993	15.4636
Samoa	WSM	882	121	0	0	0	0	0	0	0	0	0	0	0	0	0	0	0	0	0	NaN	NaN
Sao Tome and Principe	STP	678	122	0.160815	0.0214355	0.0182206	0.0140275	0.0115001	0.00471895	101511	0.18719	0.0252095	0.211165	0.179495	0.138187	0.113289	13.3293	11.3302	8.72274	7.15114	0.00359064	21.8795
Saudi Arabia	SAU	682	123	4.02799	3.33242	2.76349	2.21708	1.84908	0.758753	166047	0.306197	2.47799	20.0691	16.6428	13.3521	11.1359	82.7316	68.6072	55.0419	45.9059	0.233633	79.5617
Senegal	SEN	686	124	0.267627	0.0596237	0.0519627	0.0406626	0.0334076	0.0137085	122614	0.226104	0.060629	0.486272	0.423791	0.331632	0.272462	22.2787	19.4161	15.1938	12.4829	0.00463879	36.9764
Seychelles	SYC	690	125	0.103289	0.00258343	0.00239711	0.00190314	0.00156085	0.000640479	82400.9	0.15195	0.00421506	0.031352	0.0290909	0.0230961	0.0189421	2.50117	2.32078	1.84254	1.51115	0.000899613	14.1732
Sierra Leone	SLE	694	126	0.487903	0.0701584	0.0543901	0.0417586	0.0342594	0.014058	110744	0.204216	0.0688389	0.633519	0.491133	0.377073	0.309357	14.3796	11.1477	8.55879	7.02176	0.00856694	22.8508
Singapore	SGP	702	127	0	0	0	0	0	0	0	0	0	0	0	0	0	0	0	0	0	NaN	NaN
Slovenia	SVN	705	128	0	0	0	0	0	0	0	0	0	0	0	0	0	0	0	0	0	NaN	NaN
Solomon Islands	SLB	90	129	0	0	0	0	0	0	0	0	0	0	0	0	0	0	0	0	0	NaN	NaN
South Africa	ZAF	710	130	1.72035	0.854423	0.681031	0.523364	0.430164	0.176513	710835	1.31081	0.13466	1.202	0.958072	0.736267	0.605153	49.6657	39.5868	30.422	25.0045	0.0186742	17.0342
South Korea	KOR	410	131	3.35589	2.24636	1.8704	1.49076	1.23425	0.506463	197025	0.363322	1.39398	11.4014	9.49322	7.56634	6.26444	66.9377	55.7349	44.4222	36.7787	0.145666	99.8188
Spain	ESP	724	132	2.45422	1.51551	1.19802	0.919206	0.75474	0.3097	605821	1.11716	0.277222	2.50158	1.97751	1.51729	1.24581	61.7512	48.8145	37.454	30.7527	0.0444459	20.8879
Sri Lanka	LKA	144	133	1.28824	0.677626	0.604014	0.487943	0.405416	0.166358	388538	0.716479	0.232189	1.74404	1.55458	1.25584	1.04344	52.601	46.8868	37.8767	31.4706	0.030793	21.9232
Sudan	SDN	729	134	1.45642	1.19103	1.04705	0.845961	0.702646	0.288324	75816.3	0.139808	2.06228	15.7094	13.8104	11.158	9.26774	81.7779	71.8922	58.0849	48.2447	0.158824	72.6623
Suriname	SUR	740	135	2.67086	1.54718	1.0498	0.807981	0.689045	0.282743	64125	0.118249	2.39108	24.1277	16.3712	12.6001	10.7453	57.9283	39.3058	30.2517	25.7986	0.595365	17.4622
Sweden	SWE	752	136	8.72842	7.39479	5.60689	4.3215	3.70915	1.52201	139737	0.25768	5.90659	52.9194	40.1246	30.926	26.5438	84.7209	64.2372	49.5107	42.4951	0.344147	12.0707
Syria	SYR	760	137	0.0463088	0.0367861	0.0287555	0.0219173	0.0179823	0.00737885	7568.83	0.0139572	0.528676	4.8602	3.7992	2.89573	2.37583	79.4365	62.0951	47.3286	38.8312	0.119718	14.8447
Taiwan	TWN	158	138	2.7277	2.58149	2.2997	1.851	1.53842	0.631274	182128	0.335851	1.87962	14.174	12.6268	10.1631	8.44688	94.6399	84.3089	67.8593	56.3998	0.270284	70.7453
Tanzania	TZA	834	139	1.26284	0.919673	0.832039	0.686191	0.574094	0.235574	187672	0.346075	0.680702	4.90042	4.43347	3.65633	3.05902	72.8259	65.8865	54.3373	45.4607	0.065297	46.8524
Thailand	THA	764	140	4.10592	2.74123	1.78439	1.35319	1.11773	0.458651	221734	0.408886	1.12171	12.3627	8.0474	6.10277	5.04087	66.7629	43.4588	32.9572	27.2225	0.239955	11.0347
Togo	TGO	768	141	0.12004	0.108406	0.0998218	0.0829155	0.0691531	0.0283763	13027.5	0.0240231	1.18121	8.32139	7.66241	6.36468	5.30826	90.3083	83.1568	69.073	57.6082	0.0805014	123.845
Tonga	TON	776	142	0	0	0	0	0	0	0	0	0	0	0	0	0	0	0	0	0	NaN	NaN
Trinidad and Tobago	TTO	780	143	0.577285	0.390134	0.296143	0.227466	0.188414	0.0773138	52119.4	0.09611	0.80443	7.48539	5.68202	4.36432	3.61505	67.5808	51.2993	39.4026	32.6379	0.160205	16.1328
Tunisia	TUN	788	144	1.16619	0.557206	0.360721	0.271911	0.22332	0.0916372	89318.8	0.164707	0.556364	6.2384	4.03858	3.04428	2.50026	47.7798	30.9315	23.3161	19.1495	0.104156	4.22322
Turkey	TUR	792	145	5.33077	5.07944	4.80245	4.24366	3.64782	1.49685	202170	0.372809	4.01505	25.1246	23.7545	20.9905	18.0433	95.2852	90.0891	79.6069	68.4295	0.165283	660.024
Turkmenistan	TKM	795	146	0	0	0	0	0	0	0	0	0	0	0	0	0	0	0	0	0	NaN	NaN
Tuvalu	TUV	798	147	0	0	0	0	0	0	0	0	0	0	0	0	0	0	0	0	0	NaN	NaN
Ukraine	UKR	804	148	4.56808	4.28954	3.85159	3.31703	2.83695	1.16411	86278.5	0.159101	7.31683	49.7174	44.6413	38.4455	32.8813	93.9025	84.3153	72.6131	62.1037	0.289506	518.618
United Arab Emirates	ARE	784	149	0.642569	0.502539	0.320474	0.24238	0.203056	0.083322	13191.9	0.0243263	3.42518	38.0946	24.2933	18.3734	15.3925	78.2078	49.8739	37.7205	31.6007	0.625182	2.35637
United Kingdom	GBR	826	150	4.09555	3.50036	2.85075	2.24834	1.86792	0.766482	338011	0.623304	1.22971	10.3558	8.4339	6.65168	5.52621	85.4674	69.606	54.8971	45.6085	0.180948	53.964
United States	USA	840	151	28.1631	21.2873	17.139	13.5956	11.3012	4.63732	2.69054e+06	4.96145	0.934669	7.91192	6.37009	5.05311	4.20033	75.586	60.8562	48.2746	40.1276	0.109079	46.3644
Uruguay	URY	858	152	0.47979	0.227533	0.134242	0.103929	0.0927018	0.0380392	37596.2	0.0693287	0.548679	6.05202	3.57063	2.76436	2.46572	47.4235	27.9793	21.6614	19.3213	0.2076	36.9316
Vanuatu	VUT	548	153	0	0	0	0	0	0	0	0	0	0	0	0	0	0	0	0	0	NaN	NaN
Venezuela	VEN	862	154	2.47795	1.55377	1.13862	0.875528	0.73158	0.300196	200953	0.370566	0.810103	7.73201	5.66609	4.35687	3.64054	62.704	45.9501	35.3327	29.5236	0.167876	18.3888
Vietnam	VNM	704	155	3.38923	2.32782	1.59691	1.22002	1.01301	0.415677	325090	0.599478	0.693398	7.16055	4.9122	3.75286	3.11608	68.683	47.1171	35.9969	29.889	0.190245	19.707
Western Sahara	ESH	732	156	0.598237	0.0804686	0.0659154	0.0506787	0.0415491	0.0170492	212952	0.392692	0.0434164	0.377872	0.309532	0.237982	0.19511	13.451	11.0183	8.47134	6.94525	0.0057927	21.4608
Yemen	YEM	887	157	9.2516	8.72561	8.13465	6.85938	5.75851	2.36295	309988	0.57163	4.1337	28.1482	26.2418	22.1279	18.5765	94.3147	87.927	74.1427	62.2434	0.256194	201.59
			TOTAL	564.81	438.102	363.085	291.495	243.7		5.42288e+07			8.07876	6.69541	5.37527	4.49392	77.5662	64.2844	51.6093	43.1473
			Overall total	574.857	443.501	367.022	294.515	246.238

## Sheet: EU27_EEZs
Years below zbio
				TOC flux (TgC y-1)					Frac Total	Area		Burial / Area	Avg TOC flux (tC km-2 y-1)				BE (%)				Mean SAR	OM initial age
SOVEREIGN1	Code	UN_SOV1	COUNTRY_ID	SWI	1 years	100 years	1000 years	5000 years	at 5ky	Size (km2)	Frac Total		1 years	100 years	1000 years	5000 years	1 years	100 years	1000 years	5000 years	cm/yr	years
Belgium	BEL	56	13	0	0	0	0	0	0	0	0	0	0	0	0	0	0	0	0	0	NaN	NaN
Bulgaria	BGR	100	19	1.43105	1.37652	1.29276	1.11979	0.954869	4.98648	29460.6	0.59347	8.40224	46.7242	43.881	38.0097	32.4117	96.1898	90.3364	78.2494	66.7251	0.249513	470.248
Croatia	HRV	191	29	0.590438	0.386792	0.269327	0.203762	0.167927	0.876943	39043.7	0.786518	1.11497	9.90664	6.89809	5.21881	4.301	65.5094	45.6148	34.5103	28.4411	0.185852	6.32667
Cyprus	CYP	196	31	0.390847	0.223612	0.175426	0.133952	0.109923	0.574036	95527.4	1.92435	0.298301	2.34082	1.83639	1.40224	1.1507	57.2123	44.8834	34.2723	28.1244	0.0584359	14.3896
Denmark	DNK	208	33	9.25647	8.06282	6.4237	4.96359	4.08317	21.3229	1.4738e+06	29.6889	0.718212	5.47079	4.35861	3.36789	2.77051	87.1047	69.3969	53.6229	44.1115	0.0829269	22.3963
Estonia	EST	233	43	1.1874	0.910082	0.658375	0.504024	0.429441	2.24261	22237.5	0.447963	5.00623	40.9257	29.6066	22.6655	19.3116	76.6448	55.4467	42.4476	36.1664	0.299036	8.07935
Finland	FIN	246	46	5.88497	5.06483	3.71164	2.85141	2.46063	12.8498	66477	1.33915	9.5955	76.1893	55.8334	42.8931	37.0148	86.0638	63.0697	48.4523	41.8121	0.513762	9.49864
France	FRA	250	47	3.10774	2.01282	1.60513	1.25179	1.04639	5.46441	533654	10.7502	0.508307	3.77177	3.00781	2.34569	1.9608	64.7679	51.6494	40.2796	33.6704	0.0766534	22.0779
Germany	DEU	276	51	0.207083	0.108775	0.0729139	0.0550972	0.0455265	0.237747	6288.68	0.126683	1.87671	17.2969	11.5945	8.76133	7.23944	52.527	35.21	26.6063	21.9847	0.123228	4.7411
Greece	GRC	300	53	2.87728	1.92071	1.43455	1.09097	0.896295	4.68059	459469	9.25579	0.505694	4.18028	3.12219	2.37442	1.95072	66.7543	49.8577	37.9168	31.1507	0.0866564	12.1973
Iceland	ISL	352	61	2.26962	1.94944	1.51636	1.15761	0.950455	4.96343	442700	8.91799	0.556563	4.40353	3.42524	2.61488	2.14695	85.8927	66.8109	51.0044	41.8772	0.0920396	15.3565
Ireland	IRL	372	66	0.465614	0.389088	0.304922	0.234438	0.192671	1.00616	130305	2.62494	0.383308	2.98597	2.34006	1.79915	1.47862	83.5645	65.4882	50.3504	41.3801	0.0703017	18.4395
Italy	ITA	380	68	3.13148	2.08236	1.55572	1.18448	0.973359	5.08303	496209	9.99591	0.508512	4.19654	3.1352	2.38706	1.96159	66.4979	49.68	37.8251	31.0831	0.0860445	13.8853
Latvia	LVA	428	77	0.528543	0.363579	0.263919	0.201119	0.167696	0.875736	19454	0.391891	2.23464	18.6892	13.5663	10.3382	8.62016	68.7889	49.9332	38.0515	31.728	0.145889	11.0664
Lithuania	LTU	440	81	0.0976067	0.0590622	0.040931	0.0309647	0.0256778	0.134094	3493.09	0.0703668	1.90564	16.9083	11.7177	8.86454	7.35103	60.5104	41.9346	31.7239	26.3074	0.130456	5.28714
Malta	MLT	470	85	0.250902	0.0937427	0.067499	0.051068	0.0418296	0.218441	52976.7	1.06719	0.204688	1.76951	1.27413	0.96397	0.789585	37.3622	26.9025	20.3537	16.6717	0.0400057	7.46782
Netherlands	NLD	528	97	0.612897	0.489218	0.397427	0.310234	0.257583	1.34514	62057.6	1.25012	1.07601	7.8833	6.40417	4.99914	4.15071	79.8207	64.8441	50.6177	42.0271	0.160756	26.3573
Poland	POL	616	111	0.709015	0.542052	0.394067	0.299943	0.25082	1.30982	18623.9	0.37517	3.49128	29.1051	21.1592	16.1053	13.4676	76.4513	55.5794	42.3041	35.3758	0.197703	9.04485
Portugal	PRT	620	112	1.75605	1.50647	1.37039	1.13205	0.94723	4.94658	239628	4.82719	1.02473	6.28672	5.71881	4.72419	3.95292	85.7877	78.0381	64.4656	53.941	0.0930104	55.1807
Romania	ROU	642	116	1.4753	1.25562	1.01912	0.815719	0.683795	3.57089	27166.2	0.54725	6.52515	46.2201	37.5144	30.027	25.1708	85.1094	69.0788	55.2916	46.3494	0.268734	124.579
Slovenia	SVN	705	128	0	0	0	0	0	0	0	0	0	0	0	0	0	0	0	0	0	NaN	NaN
Spain	ESP	724	132	2.45422	1.51551	1.19802	0.919206	0.75474	3.94137	605821	12.204	0.322958	2.50158	1.97751	1.51729	1.24581	61.7512	48.8145	37.454	30.7527	0.0444459	20.8879
Sweden	SWE	752	136	8.72842	7.39479	5.60689	4.3215	3.70915	19.3698	139737	2.81494	6.88106	52.9194	40.1246	30.926	26.5438	84.7209	64.2372	49.5107	42.4951	0.344147	12.0707
			TOTAL	47.413	37.7079	29.3791	22.8327	19.1492		4.96412e+06			7.59609	5.91828	4.59954	3.85751	79.5308	61.9642	48.1571	40.388
			Overall total	574.857	443.501	367.022	294.515	246.238	7.7767

## Sheet: SensitivityAnalysis
Global coastal margin TOC transfer fluxes through different age layers
	TOC flux (TgC y-1)
Experiment	SWI	1 yr	100 yrs	250 yrs	500 yrs	1000 yrs	2000 yrs	3000 yrs	4000 yrs	5000 yrs
Best estimate	574.857	443.501	367.022	339.425	317.15	294.515	272.623	260.503	252.315	246.238
SAR (mean – 0.25 x STD)	491.941	362.282	300.427	278.056	259.876	241.388	223.458	213.509	206.818	201.811
SAR (mean + 0.25 x STD)	922.764	785.344	646.666	594.93	553.97	513.246	474.38	452.934	438.442	427.748
TOC < median	363.713	280.218	231.962	214.509	200.346	186.038	172.193	164.523	159.341	155.491
TOC > median	769.184	591.513	489.653	452.89	423.007	392.834	363.665	347.525	336.623	328.526
POR > median	428.505	331.429	275.052	254.518	237.942	221.126	204.962	196.1	190.174	185.822
POR < median	668.397	513.507	423.397	391.358	365.553	339.341	313.94	299.826	290.255	283.123
